# Supplementary material for: Evaluation of the Antioxidant Properties of Carvacrol as a Prospective Replacement for Crude Essential Oils and Synthetic Antioxidants in Food Storage
Source: MDPI journal article supplement (doi:10.3390/molecules28031315), 2023-01-30
Supplement: s1 [file s1]

Supplementary Materials

# Evaluation of the Antioxidant Properties of Carvacrol as a Prospective Replacement for Crude Essential Oils and Synthetic Antioxidants in Food Storage

Israel Ehizuelen Ebhohimen <sup>1</sup>, Ngozi P. Okolie <sup>2</sup>, Moses Okpeku <sup>3,\*</sup>, Mfon Unweator <sup>4</sup>, Victoria T. Adeleke <sup>5</sup> and Lawrence Edemhanria <sup>4</sup>

<sup>1</sup> Department of Biochemistry, Ambrose Alli University, Ekpoma 310006, Nigeria

<sup>2</sup> Department of Biochemistry, University of Benin, Benin City 300213, Nigeria

<sup>3</sup> Discipline of Genetics, School of Life Sciences, University of KwaZulu-Natal, Durban 4041, South Africa

<sup>4</sup> Department of Chemical Sciences, Glorious Vision University, Ogoja 310107, Nigeria

<sup>5</sup> Department of Chemical Engineering, Mangosuthu University of Technology, Umlazi 4031, South Africa

\* Correspondence: okpekum@ukzn.ac.za

|                |                                                                 |    |
|----------------|-----------------------------------------------------------------|----|
| 3V92_1 Chains  | -----                                                           | 0  |
| XP_025140741.1 | -----                                                           | 0  |
| XP_006065761.1 | -----                                                           | 0  |
| XP_025140740.1 | -----                                                           | 0  |
| XP_006065760.1 | -----                                                           | 0  |
| XP_006065763.1 | -----                                                           | 0  |
| NP_001179721.1 | -----                                                           | 0  |
| XP_019809802.1 | -----                                                           | 0  |
| CAC33511.1     | -----                                                           | 0  |
| XP_010852818.1 | MQEGGTRDRGQEKIFANLEVF TGSQQSVH RGTLP PGILPASAPRHLQPPTPTPTPEQESH | 60 |
| XP_005909628.1 | -----PRPPPTPEQESH                                               | 13 |
| MXQ85771.1     | -----                                                           | 0  |
| ELR46226.1     | -----                                                           | 0  |

|                |                                                               |     |
|----------------|---------------------------------------------------------------|-----|
| 3V92_1 Chains  | -----MGSSHHHHHSSGLVPRGSHMPSYTVTVATGSQEHAGTDDYI                | 42  |
| XP_025140741.1 | -----MPSYTVTVATGSQWFAGTDDYI                                   | 22  |
| XP_006065761.1 | -----MPSYTVTVATGSQWFAGTDDYI                                   | 22  |
| XP_025140740.1 | -----MPSYTVTVATGSQWFAGTDDYI                                   | 22  |
| XP_006065760.1 | -----MPSYTVTVATGSQWFAGTDDYI                                   | 22  |
| XP_006065763.1 | -----MPSYTVTVATGSQWFAGTDDYI                                   | 22  |
| NP_001179721.1 | -----MPSYTVTVATGSQWFAGTDDYI                                   | 22  |
| XP_019809802.1 | -----MPSYTVTVATGSQWFAGTDDYI                                   | 22  |
| CAC33511.1     | -----MPSYTVTVATGSQWFAGTDDYI                                   | 22  |
| XP_010852818.1 | FPWSRHGPGRIHHTSPHVD FPLWGLRCQQQDACRPHLASVEFS                  | 103 |
| XP_005909628.1 | FPWSRHGPGRIHHTSPHVD FPLRGLRCQQQDACRPHLASVEFSMPHPSGKRALPSHG--V | 71  |
| MXQ85771.1     | -----MP--SYTVTVATGSQWFAGTDDYI                                 | 22  |
| ELR46226.1     | -----                                                         | 0   |

|                |                                                             |     |
|----------------|-------------------------------------------------------------|-----|
| 3V92_1 Chains  | YLSLVGSAGCSEKHLLDKGS-----FERG-----AVD                       | 69  |
| XP_025140741.1 | YLSLVGSAGCSEKHLLD--KPFYNDFERGA-----VD                       | 52  |
| XP_006065761.1 | YLSLVGSAGCSEKHLLD--KPFYNDFERGA-----VD                       | 52  |
| XP_025140740.1 | YLSLVGSAGCSEKHLLD--KPFYNDFERGA-----VD                       | 52  |
| XP_006065760.1 | YLSLVGSAGCSEKHLLD--KPFYNDFERGA-----VD                       | 52  |
| XP_006065763.1 | YLSLVGSAGCSEKHLLD--KPFYNDFERGA-----VD                       | 52  |
| NP_001179721.1 | YLSLVGSAGCSEKHLLD--KPFYNDFERGA-----VD                       | 52  |
| XP_019809802.1 | YLSLVGSAGCSEKHLLD--KPFYNDFERGA-----VD                       | 52  |
| CAC33511.1     | YLSLVGSAGCSEKHLLD--KPFYNDFERGA-----VD                       | 52  |
| XP_010852818.1 | -----VD                                                     | 105 |
| XP_005909628.1 | S---RERAGITDKCTVECDPQVGPWAGRGLSILQIVDPWGEGRPQ-----VGKGVFVD  | 123 |
| MXQ85771.1     | YLSLVGSAGCSEKHLLD--KPFYNDFERGA---VRALGWDGLGPRGRVRRARPGPIGVD | 76  |
| ELR46226.1     | -----VD                                                     | 2   |

\*\*

|                |                                                             |     |
|----------------|-------------------------------------------------------------|-----|
| 3V92_1 Chains  | SYDVTVDEELGEIQLVRIEKKRYGSNDWYLYKITLTKPHGDYIEFPCYRWITGDVEVVL | 129 |
| XP_025140741.1 | SYDVTVDEELGDIQLIKIEKKRYWFHDDWYLYKITVKTPCGDYIEFPCYRWISGEIEVL | 112 |
| XP_006065761.1 | SYDVTVDEELGDIQLIKIEKKRYWFHDDWYLYKITVKTPCGDYIEFPCYRWISGEIEVL | 112 |
| XP_025140740.1 | SYDVTVDEELGDIQLIKIEKKRYWFHDDWYLYKITVKTPCGDYIEFPCYRWISGEIEVL | 112 |
| XP_006065760.1 | SYDVTVDEELGDIQLIKIEKKRYWFHDDWYLYKITVKTPCGDYIEFPCYRWISGEIEVL | 112 |
| XP_006065763.1 | SYDVTVDEELGDIQLIKIEKKRYWFHDDWYLYKITVKTPCGDYIEFPCYRWISGEIEVL | 112 |
| NP_001179721.1 | SYDVTVDEELGDIQLIKIEKKRYWFHDDWYLYKITVKTPCGDYIEFPCYRWISGEIEVL | 112 |
| XP_019809802.1 | SYDVTVDEELGDIQLIKIEKKRYWFHDDWYLYKITVKTPCGDYIEFPCYRWISGEIEVL | 112 |
| CAC33511.1     | SYDVTVDEELGDIQLIKIEKKRYWFHDDWYLYKITVKTPCGDYIEFPCYRWISGEIEVL | 112 |
| XP_010852818.1 | SYDVTVDEELGDIQLIKIEKKRYWFHDDWYLYKITVKTPCGDYIEFPCYRWISGEIEVL | 165 |
| XP_005909628.1 | SYDVTVDEELGDIQLIKIEKKRYWFHDDWYLYKITVKTPCGDYIEFPCYRWISGEIEVL | 183 |
| MXQ85771.1     | SYDVTVDEELGDIQLIKIEKKRYWFHDDWYLYKITVKTPCGDYIEFPCYRWISGEIEVL | 136 |
| ELR46226.1     | SYDVTVDEELGDIQLIKIEKKRYWFHDDWYLYKITVKTPCGDYIEFPCYRWISGEIEVL | 62  |

|                |                                                              |     |
|----------------|--------------------------------------------------------------|-----|
| 3V92_1 Chains  | RDGRAKLARDDQIHILKQHRRKELETRQKQYRWMEWNPGFPLSIDAKCHKDLPRDIQFDS | 189 |
| XP_025140741.1 | RDGQAKLACDDQIHILKQHRRKELETRQKQYRWMEWNPGFPLSIDAKCHKDLPRDIQFDS | 172 |
| XP_006065761.1 | RDGQAKLACDDQIHILKQHRRKELETRQKQYRWMEWNPGFPLSIDAKCHKDLPRDIQFDS | 172 |
| XP_025140740.1 | RDGQAKLACDDQIHILKQHRRKELETRQKQYRWMEWNPGFPLSIDAKCHKDLPRDIQFDS | 172 |
| XP_006065760.1 | RDGQAKLACDDQIHILKQHRRKELETRQKQYRWMEWNPGFPLSIDAKCHKDLPRDIQFDS | 172 |
| XP_006065763.1 | RDGQAKLACDDQIHILKQHRRKELETRQKQYRWMEWNPGFPLSIDAKCHKDLPRDIQFDS | 172 |
| NP_001179721.1 | RDGQAKLACDDQIHVLKQHRRKELETRQKQYRWMEWNPGFPLSIDAKCHKDLPRDIQFDS | 172 |
| XP_019809802.1 | RDGQAKLACDDQIHVLKQHRRKELETRQKQYRWMEWNPGFPLSIDAKCHKDLPRDIQFDS | 172 |
| CAC33511.1     | RDGQAKLACDDQIHVLKQHRRKELETRQKQYRWMEWNPGFPLSIDAKCHKDLPRDIQFDS | 172 |
| XP_010852818.1 | RDGQAKLACDDQIHVLKQHRRKELETRQKQYRWMEWNPGFPLSIDAKCHKDLPRDIQFDS | 225 |
| XP_005909628.1 | RDGQAKLACDDQIHVLKQHRRKELETRQKQYRWMEWNPGFPLSIDAKCHKDLPRDIQFDS | 243 |
| MXQ85771.1     | RDGQAKLACDDQIHVLKQHRRKELETRQKQYRWMEWNPGFPLSIDAKCHKDLPRDIQFDS | 196 |
| ELR46226.1     | RDGQAKLACDDQIHVLKQHRRKELETRQKQYRWMEWNPGFPLSIDAKCHKDLPRDIQFDS | 122 |
|                | *****                                                        |     |

|                |                                                               |     |
|----------------|---------------------------------------------------------------|-----|
| 3V92_1 Chains  | EKGVD FVLNYSKAMENLFINRFMHMFQSSWSDFADEKIFVKISNTISERVMNHWQEDLM  | 249 |
| XP_025140741.1 | EKGVD FVLNYSKAMENLFINRFMHMFQSSWSDFADEKIFVRIISNTISERVMNHWQEDLM | 232 |
| XP_006065761.1 | EKGVD FVLNYSKAMENLFINRFMHMFQSSWSDFADEKIFVRIISNTISERVMNHWQEDLM | 232 |
| XP_025140740.1 | EKGVD FVLNYSKAMENLFINRFMHMFQSSWSDFADEKIFVRIISNTISERVMNHWQEDLM | 232 |
| XP_006065760.1 | EKGVD FVLNYSKAMENLFINRFMHMFQSSWSDFADEKIFVRIISNTISERVMNHWQEDLM | 232 |
| XP_006065763.1 | EKGVD FVLNYSKAMENLFINRFMHMFQSSWSDFADEKIFVRIISNTISERVMNHWQEDLM | 232 |
| NP_001179721.1 | EKGVD FVLNYSKAMENLFINRFMHMFQSSWSDFADEKIFVRIISNTISERVMNHWQEDRM | 232 |
| XP_019809802.1 | EKGVD FVLNYSKAMENLFINRFMHMFQSSWSDFADEKIFVRIISNTISERVMNHWQEDRM | 232 |
| CAC33511.1     | EKGVD FVLNYSKAMENLFINRFMHMFQSSWSDFADEKIFVRIISNTISERVMNHWQEDRM | 232 |
| XP_010852818.1 | EKGVD FVLNYSKAMENLFINRFMHMFQSSWSDFADEKIFVRIISNTISERVMNHWQEDLM | 285 |
| XP_005909628.1 | EKGVD FVLNYSKAMENLFINRFMHMFQSSWSDFADEKIFVRIISNTISERVMNHWQEDLM | 303 |
| MXQ85771.1     | EKGVD FVLNYSKAMENLFINRFMHMFQSSWSDFADEKIFVRIISNTISERVMNHWQEDLM | 256 |
| ELR46226.1     | EKGVD FVLNYSKAMENLFINRFMHMFQSSWSDFADEKIFVRIISNTISERVMNHWQEDLM | 182 |

| 3V92_1 Chains  | FGYQFLNGANPVLIRRCTELPEKLPVTTMVECSLERQLSLEQEVQQGNIFIVDFKLLDG | 309 |
|----------------|-------------------------------------------------------------|-----|
| XP_025140741.1 | FGYQFLNGCNPMVIQRCLKLPDNLPTTMMVECSLERQLTLEQEIQQGNIFIVDFKLLDG | 292 |
| XP_006065761.1 | FGYQFLNGCNPMVIQRCLKLPDNLPTTMMVECSLERQLTLEQEIQQGNIFIVDFKLLDG | 292 |
| XP_025140740.1 | FGYQFLNGCNPMVIQRCLKLPDNLPTTMMVECSLERQLTLEQEIQQGNIFIVDFKLLDG | 292 |
| XP_006065760.1 | FGYQFLNGCNPMVIQRCLKLPDNLPTTMMVECSLERQLTLEQEIQQGNIFIVDFKLLDG | 292 |
| XP_006065763.1 | FGYQFLNGCNPMVIQRCLKLPDNLPTTMMVECSLERQLTLEQEIQQGNIFIVDFKLLDG | 292 |
| NP_001179721.1 | FGYQFLNGCNPMVIQRCLKLPDNLPTTMMVECSLERQLTLEQEIQQGNIFIVDFKLLDG | 292 |
| XP_019809802.1 | FGYQFLNGCNPMVIQRCLKLPDNLPTTMMVECSLERQLTLEQEIQQGNIFIVDFKLLDG | 292 |
| CAC33511.1     | FGYQFLNGCNPMVIQRCLKLPDNLPTTMMVECSLERQLTLEQEIQQGNIFIVDFKLLDG | 292 |
| XP_010852818.1 | FGYQFLNGCNPMVIQRCLKLPDNLPTTMMVECSLERQLTLEQEIQQGNIFIVDFKLLDG | 345 |
| XP_005909628.1 | FGYQFLNGCNPMVIQRCLKLPDNLPTTMMVECSLERQLTLEQEIQQGNIFIVDFKLLDG | 363 |
| MXQ85771.1     | FGYQFLNGCNPMVIQRCLKLPDNLPTTMMVECSLERQLTLEQEIQQGNIFIVDFKLLDG | 316 |
| ELR46226.1     | FGYQFLNGCNPMVIQRCLKLPDNLPTTMMVECSLERQLTLEQEIQQGNIFIVDFKLLDG | 242 |

|                |                                                              |     |
|----------------|--------------------------------------------------------------|-----|
| 3V92_1 Chains  | IDANKTDPCTLQFLAAPICLLYKNLANKIVPIAIQLNQIPGDENPIFLPSDAKYDWLLAK | 369 |
| XP_025140741.1 | IDANKTDPCTLQFLAAPICLLYKNLANKIVPIAIQLNQVPGEENPIFLPSDAKYDWLLAK | 352 |
| XP_006065761.1 | IDANKTDPCTLQFLAAPICLLYKNLANKIVPIAIQLNQVPGEENPIFLPSDAKYDWLLAK | 352 |
| XP_025140740.1 | IDANKTDPCTLQFLAAPICLLYKNLANKIVPIAIQLNQVPGEENPIFLPSDAKYDWLLAK | 352 |
| XP_006065760.1 | IDANKTDPCTLQFLAAPICLLYKNLANKIVPIAIQLNQVPGEENPIFLPSDAKYDWLLAK | 352 |
| XP_006065763.1 | IDANKTDPCTLQFLAAPICLLYKNLANKIVPIAIQLNQVPGEENPIFLPSDAKYDWLLAK | 352 |
| NP_001179721.1 | IDANKTDPCTLQFLAAPICLLYKNLANKIVPIAIQLNQVPGEENPIFLPSDAKYDWLLAK | 352 |
| XP_019809802.1 | IDANKTDPCTLQFLAAPICLLYKNLANKIVPIAIQLNQVPGEENPIFLPSDAKYDWLLAK | 352 |
| CAC33511.1     | IDANKTDPCTLQFLAAPICLLYKNLANKIVPIAIQLNQVPGEENPIFLPSDAKYDWLLAK | 352 |
| XP_010852818.1 | IDANKTDPCTLQFLAAPICLLYKNLANKIVPIAIQLNQVPGEENPIFLPSDAKYDWLLAK | 405 |
| XP_005909628.1 | IDANKTDPCTLQFLAAPICLLYKNLANKIVPIAIQLNQVPGEENPIFLPSDAKYDWLLAK | 423 |
| MXQ85771.1     | IDANKTDPCTLQFLAAPICLLYKNLANKIVPIAIQLNQVPGEENPIFLPSDAKYDWLLAK | 376 |
| ELR46226.1     | IDANKTDPCTLQFLAAPICLLYKNLANKIVPIAIQLNQVPGEENPIFLPSDAKYDWLLAK | 302 |

\*\*\*\*\*:\*\*\*\*

|                |                                                              |     |
|----------------|--------------------------------------------------------------|-----|
| 3V92_1 Chains  | IWVRSSDFHVHQTITHLLRTHLVSEVFGIAMYRQLPAVHPIFKLLVAHVRFTIAINTKAR | 429 |
| XP_025140741.1 | IWVRSSDFHVHQTITHLLRTHLVSEVFGIAMYRQLPAVHPIFK-----             | 395 |
| XP_006065761.1 | IWVRSSDFHVHQTITHLLRTHLVSEVFGIAMYRQLPAVHPIFK-----             | 395 |
| XP_025140740.1 | IWVRSSDFHVHQTITHLLRTHLVSEVFGIAMYRQLPAVHPIFKLLVAHVRFTIAINTKAR | 412 |
| XP_006065760.1 | IWVRSSDFHVHQTITHLLRTHLVSEVFGIAMYRQLPAVHPIFKLLVAHVRFTIAINTKAR | 412 |
| XP_006065763.1 | IWVRSSDFHVHQTITHLLRTHLVSEVFGIAMYRQLPAVHPIFKLLVAHVRFTIAINTKAR | 412 |
| NP_001179721.1 | IWVRSSDFHVHQTITHLLRTHLVSEVFGIAMYRQLPAVHPIFKLLVAHVRFTIAINTKAR | 412 |
| XP_019809802.1 | IWVRSSDFHVHQTITHLLRTHLVSEVFGIAMYRQLPAVHPIFKLLVAHVRFTIAINTKAR | 412 |
| CAC33511.1     | IWVRSSDFHVHQTITHLLRTHLVSEVFGIAMYRQLPAVHPIFKLLVAHVRFTIAINTKAR | 412 |
| XP_010852818.1 | IWVRSSDFHVHQTITHLLRTHLVSEVFGIAMYRQLPAVHPIFKLLVAHVRFTIAINTKAR | 465 |
| XP_005909628.1 | IWVRSSDFHVHQTITHLLRTHLVSEVFGIAMYRQLPAVHPIFKLLVAHVRFTIAINTKAR | 483 |
| MXQ85771.1     | IWVRSSDFHVHQTITHLLRTHLVSEVFGIAMYRQLPAVHPIFKLLVAHVRFTIAINTKAR | 436 |
| ELR46226.1     | IWVRSSDFHVHQTITHLLRTHLVSEVFGIAMYRQLPAVHPIFKLLVAHVRFTIAINTKAR | 362 |

\*\*\*\*\*

|                |                                                               |     |
|----------------|---------------------------------------------------------------|-----|
| 3V92_1 Chains  | EQLICECGLFDKANATGGGGHVQMVQRAMQDLTYASLCFPEAIKARGMESKEDIPIYYFYR | 489 |
| XP_025140741.1 | -----AIKARGMDNAEDIPIYYFYR                                     | 414 |
| XP_006065761.1 | -----ANATGGGGHVQMVQRAMQDLTYTSLCFPEAIKARGMDNAEDIPIYYFYR        | 443 |
| XP_025140740.1 | EQLICEYGLFDK-----AIKARGMDNAEDIPIYYFYR                         | 443 |
| XP_006065760.1 | EQLICEYGLFDKANATGGGGHVQMVQRAMQDLTYTSLCFPEAIKARGMDNAEDIPIYYFYR | 472 |
| XP_006065763.1 | EQLICEYGLFDKANATGGGGHVQMVQRAMQDLTYTSLCFPEAIKARGMDNAEDIPIYYFYR | 472 |
| NP_001179721.1 | EQLICEYGLFDKANATGGGGHVQMVQRAMQDLTYTSLCFPEAIKARGMDNAEDIPIYYFYR | 472 |
| XP_019809802.1 | EQLICEYGLFDKANATGGGGHVQMVQRAMQDLTYTSLCFPEAIKARGMDNAEDIPIYYFYR | 472 |
| CAC33511.1     | EQLICEYGLFDKANATGG-----                                       | 430 |
| XP_010852818.1 | EQLICEYGLFDKANATGGGGHVQMVQRAMQDLTYTSLCFPEAIKARGMDNAEDIPIYYFYR | 525 |
| XP_005909628.1 | EQLICEYGLFDKANATGGGGHVQMVQRAMQDLTYTSLCFPEAIKARGMDNAEDIPIYYFYR | 543 |
| MXQ85771.1     | EQLICEYGLFDKANATGGGGHVQMVQRAMQDLTYTSLCFPEAIKARGMDNAEDIPIYYFYR | 496 |
| ELR46226.1     | EQLICEYGLFDKANATGGGGHVQMVQRAMQDLTYTSLCFPEAIKARGMDNAEDIPIYYFYR | 422 |

|                |                                                                |     |
|----------------|----------------------------------------------------------------|-----|
| 3V92_1 Chains  | DDGLLVWEAIRTFFAEVVDIYYEGDQVVEEDQELQDFVNDVYVYGMGRKSSGFPPKSVKS   | 549 |
| XP_025140741.1 | DDGLLVWEAIRTFFAEVVDIYYESDQVVEEDQELQDFVKDVYMYGMGRKKASGFPPKSIKT  | 474 |
| XP_006065761.1 | DDGLLVWEAIRTFFAEVVDIYYESDQVVEEDQELQDFVKDVYMYGMGRKKASGFPPKSIKT  | 503 |
| XP_025140740.1 | DDGLLVWEAIRTFFAEVVDIYYESDQVVEEDQELQDFVKDVYMYGMGRKKASGFPPKSIKT  | 503 |
| XP_006065760.1 | DDGLLVWEAIRTFFAEVVDIYYESDQVVEEDQELQDFVKDVYMYGMGRKKASGFPPKSIKT  | 532 |
| XP_006065763.1 | DDGLLVWEAIRTFFAEVVDIYYESDQVVEEDQELQDFVKDVYMYGMGRKKASGFPPKSIKT  | 532 |
| NP_001179721.1 | DDGLLVWEAIRTFFAEVVGIIYYEGDQVVEEDQELQDFVKDVYMYGMGRKKASGFPPKSIKA | 532 |
| XP_019809802.1 | DDGLLVWEAIRTFFAEVVGIIYYEGDQVVEEDQELQDFVKDVYMYGMGRKKASGFPPKSIKT | 532 |
| CAC33511.1     | -----                                                          | 430 |
| XP_010852818.1 | DDGLLVWEAIRTFFAEVVDIYYESDQVVEEDQELQDFVKDVYMYGMGRKKASGFPPKSIKT  | 585 |
| XP_005909628.1 | DDGLLVWEAIRTFFAEVVDIYYEGDQVVEEDQELQDFVKDVYMYGMGRKKASGFPPKSIKT  | 603 |
| MXQ85771.1     | DDGLLVWEAIRTFFAEVVDIYYEGDQVVEEDQELQDFVKDVYMYGMGRKKASGFPPKSIKT  | 556 |
| ELR46226.1     | DDGLLVWEAIRTFFAEVVDIYYEGDQVVEEDQELQDFVKDVYMYGMGRKKASGFPPKSIKT  | 482 |

|                |                                                              |     |
|----------------|--------------------------------------------------------------|-----|
| 3V92_1 Chains  | REQLSEYLTVVIFTASAQHAAVNFGQYDWASWIPNAPPTMRAPPPTAKGVVTIEQIVDTL | 609 |
| XP_025140741.1 | KEKLCEYLTVVIFTASAQHAAVNFGQYDWCSWIPNAPPTMRAPPPTAKGVVTIEQIVETL | 534 |
| XP_006065761.1 | KEKLCEYLTVVIFTASAQHAAVNFGQYDWCSWIPNAPPTMRAPPPTAKGVVTIEQIVETL | 563 |
| XP_025140740.1 | KEKLCEYLTVVIFTASAQHAAVNFGQYDWCSWIPNAPPTMRAPPPTAKGVVTIEQIVETL | 563 |
| XP_006065760.1 | KEKLCEYLTVVIFTASAQHAAVNFGQYDWCSWIPNAPPTMRAPPPTAKGVVTIEQIVETL | 592 |
| XP_006065763.1 | KEKLCEYLTVVIFTASAQHAAVNFGQ-----                              | 558 |
| NP_001179721.1 | KEKLCEYLTVVIFTASAQHAAVNFGQYDWCSWIPNAPPTMRAPPPTAKGVVTIEQIVETL | 592 |
| XP_019809802.1 | KEKLCEYLTVVIFTASAQHAAVNFGQYDWCSWIPNAPPTMRAPPPTAKGVVTIEQIVETL | 592 |
| CAC33511.1     | -----                                                        | 430 |
| XP_010852818.1 | KEKLCEYLTVVIFTASAQHAAVNFGQYDWCSWIPNAPPTMRAPPPTAKGVVTIEQIVETL | 645 |
| XP_005909628.1 | KEKLCEYLTVVIFTASAQHAAVNFGQYDWCSWIPNAPPTMRAPPPTAKGVVTIEQIVETL | 663 |
| MXQ85771.1     | KEKLCEYLTVVIFTASAQHAAVNFGQYDWCSWIPNAPPTMRAPPPTAKGVVTIEQIVETL | 616 |
| ELR46226.1     | KEKLCEYLTVVIFTASAQHAAVNFGQYDWCSWIPNAPPTMRAPPPTAKGVVTIEQIVETL | 542 |
|                |                                                              |     |
| 3V92_1 Chains  | PDRGRSCWHLGAVWALSQFQENELFLGMYPEEHFIEKPVKEAMARFRKNLDSIVSVIAER | 669 |
| XP_025140741.1 | PDRGRSCWHLGAVWALSQFQDNELFLGMYPEEHFIEKPVKEAMARFRKNLDSIVSVIAER | 594 |
| XP_006065761.1 | PDRGRSCWHLGAVWALSQFQDNELFLGMYPEEHFIEKPVKEAMARFRKNLDSIVSVIAER | 623 |
| XP_025140740.1 | PDRGRSCWHLGAVWALSQFQDNELFLGMYPEEHFIEKPVKEAMARFRKNLDSIVSVIAER | 623 |
| XP_006065760.1 | PDRGRSCWHLGAVWALSQFQDNELFLGMYPEEHFIEKPVKEAMARFRKNLDSIVSVIAER | 652 |
| XP_006065763.1 | -----LFLGMYPEEHFIEKPVKEAMARFRKNLDSIVSVIAER                   | 595 |
| NP_001179721.1 | PDRGRSCWHLGAVWALSQFQDNELFLGMYPEEHFVEKPVKEAMARFRKNLDSIVSVIAER | 652 |
| XP_019809802.1 | PDRGRSCWHLGAVWALSQFQDNELFLGMYPEEHFVEKPVKEAMARFRKNLDSIVSVIAER | 652 |
| CAC33511.1     | -----                                                        | 430 |
| XP_010852818.1 | PDRGRSCWHLGAVWALSQFQDNELFLGMYPEEHFIEKPVKEAMARFRKNLDSIVSVIAER | 705 |
| XP_005909628.1 | PDRGRSCWHLGAVWALSQFQDNELFLGMYPEEHFVEKPVKEAMARFRKNLDSIVSVIAER | 723 |
| MXQ85771.1     | PDRGRSCWHLGAVWALSQFQDNELFLGMYPEEHFVEKPVKEAMARFRKNLDSIVSVIAER | 676 |
| ELR46226.1     | PDRGRSCWHLGAVWALSQFQDNELFLGMYPEEHFVEKPVKEAMARFRKNLDSIVSVIAER | 602 |
|                |                                                              |     |
| 3V92_1 Chains  | NENLQLPYYYLAPDRIPNSVAI                                       | 691 |
| XP_025140741.1 | NKNKKLPYYLSPDRIPNSVAI                                        | 616 |
| XP_006065761.1 | NKNKKLPYYLSPDRIPNSVAI                                        | 645 |
| XP_025140740.1 | NKNKKLPYYLSPDRIPNSVAI                                        | 645 |
| XP_006065760.1 | NKNKKLPYYLSPDRIPNSVAI                                        | 674 |
| XP_006065763.1 | NKNKKLPYYLSPDRIPNSVAI                                        | 617 |
| NP_001179721.1 | NKNKKLPYYLSPDRIPNSVAI                                        | 674 |
| XP_019809802.1 | NKNKKLPYYLSPDRIPNSVAI                                        | 674 |
| CAC33511.1     | -----                                                        | 430 |
| XP_010852818.1 | NKNKKLPYYLSPDRIPNSVAI                                        | 727 |
| XP_005909628.1 | NKNKKLPYYLSPDRIPNSVAI                                        | 745 |
| MXQ85771.1     | NKNKKLPYYLSPDRIPNSVAI                                        | 698 |
| ELR46226.1     | NKNKKLPYYLSPDRIPNSVAI                                        | 624 |

Figure S1. Multiple sequence Alignment.
